# Supplementary material for: Efficient removal of tetracycline in water using modified eggplant straw biochar supported green nanoscale zerovalent iron: synthesis, removal performance, and mechanism
Source: Royal Society of Chemistry journal article supplement (doi:10.1039/d3ra08417e), 2024-01-01
Supplement: d3ra08417e1.pdf [file d3ra08417e1.pdf]

## Supplementary Information

Efficient removal of tetracycline in water using modified eggplant straw biochar supported green nanoscale zerovalent iron: synthesis, removal performance, and mechanism

Guofu Huang<sup>a, b, c</sup>, Mianmian Wang<sup>\*a, b, c</sup>, Qing Liu<sup>a, b, c</sup>, Shasha Zhao<sup>a, b, c</sup>, Haijian Liu<sup>a, b, c</sup>, Fangfang Liu<sup>a, b</sup>, Jun Liu<sup>a, b</sup>

a. School of Chemical Engineering and Environment, Weifang University of Science and Technology, Weifang, 262700, China.

b. Shandong Engineering Laboratory for Clean Utilization of Chemical Resources, Weifang, 262700, China.

c. Weifang Key Laboratory of Chemical Wastewater Pollution Control and Resource Reuse, Weifang, 262700, China.

---

\* Corresponding author.

E-mail addresses: 253463877@qq.com

### **Text S1 The synthesis of B-nZVI/ESBC composite**

B-nZVI/ESBC composite was synthesized by the following liquid phase reduction method using  $\text{NaBH}_4$  as the reducing agent. Typically, 0.5 g of ESBC and 0.8297 g of  $\text{FeSO}_4 \cdot 7\text{H}_2\text{O}$  were added to a 250 mL three-necked flask containing 100 mL of deoxygenated water, and stirred thoroughly for 2 h at room temperature. Then, 10 mL of  $\text{NaBH}_4$  solution was added dropwise to the mixed solution and stirred for another 1 h. In this process,  $\text{Fe}^{2+}$  was reduced to nZVI and bound to the surface of ESBC to form B-nZVI/ESBC composite. The above reactions were carried out under nitrogen protection. The formed solid composite was collected by centrifugation and washed three times with deoxygenated water and anhydrous ethanol, respectively. Finally, B-nZVI/ESBC composite was vacuum dried at 80 °C for 12 h and stored in a nitrogen-filled bottle for further use.

## **Text S2 The characterization of as-synthesized materials**

Field emission scanning electron microscopy (FE-SEM, JSM 7500F, Japan) was used to examine the morphological characteristics of as-synthesized materials at a voltage of 5 kV. The surface areas, pore volumes and pore sizes of the materials were measured with a Brunauer–Emmett–Teller (BET) analyzer (Micromeritics ASAP2460, USA) by N<sub>2</sub> adsorption/desorption method at -196 °C. The crystal structures of as-synthesized materials were analyzed with a D8 Advance X-ray diffractometer (Germany) equipped with a Cu-K $\alpha$  radiation (45 kV, 40 mA). Samples were scanned from 10° to 90° 2 $\theta$  at a speed of 3° 2 $\theta$ /min. Fourier transform infrared (FTIR) analyses of as-synthesized materials were performed with a FTIR spectrometer (Vertex 70, Bruker, Germany). Samples were mixed with KBr at a ratio of 1:100 (w/w), pressed into thin slices, and scanned at a resolution of 4 cm<sup>-1</sup> within the range of 4000-400 cm<sup>-1</sup>. The chemical compositions of materials were analyzed using an X-ray photoelectron spectrometer (XPS, ESCALAB 250XI, Thermo, USA) with an Al K $\alpha$  radiation source. The zeta potentials of P-nZVI/ESBC composite were measured using Zetasizer Nano (EKYS-130, Malvern UK) at solution pH from 2 to 11.

Table S1 Specific surface area and porosity of material.

| Material    | BET Surface Area<br>(m <sup>2</sup> g <sup>-1</sup> ) | Pore Volume<br>(cm <sup>3</sup> g <sup>-1</sup> ) | BJH Pore Size<br>(nm) |
|-------------|-------------------------------------------------------|---------------------------------------------------|-----------------------|
| P-nZVI/ESBC | 203.81                                                | 0.1186                                            | 10.34                 |

Table S2 Comparison of adsorption capacities of different materials for TC.

| Materials                                      | Reaction condition                                                            | $q_m$ (mg g <sup>-1</sup> ) | Reference                |
|------------------------------------------------|-------------------------------------------------------------------------------|-----------------------------|--------------------------|
| nZVI                                           |                                                                               | 105.46                      |                          |
| pumice supported nZVI composite                | Materials: 5 g L <sup>-1</sup> , TC: 25-300 mg L <sup>-1</sup> , pH: 8, 25 °C | 115.13                      | Guler <sup>1</sup>       |
| ZVI/BC (co-pyrolysis of hematite and pinewood) | Material: 1 g L <sup>-1</sup> , TC: 25-400 mg L <sup>-1</sup> , 25 °C         | 301.39                      | Shi et al. <sup>2</sup>  |
| Fe/BC (blue-green microalgae)                  | Material: 2 g L <sup>-1</sup> , TC: 25-1000 mg L <sup>-1</sup>                | 95.86                       | Peng et al. <sup>3</sup> |
| Biochar R600 (rice straw)                      | Material: 3 g L <sup>-1</sup> , TC: 0.5-32 mg L <sup>-1</sup> , 25 °C         | 14.185                      | Wang et al. <sup>4</sup> |
| Fe loaded biochar (sewage sludge)              | Material: 0.2 g L <sup>-1</sup> , TC: 2-45 mg L <sup>-1</sup> , pH: 6, 25 °C  | 123.35                      | Fan et al. <sup>5</sup>  |
| P-nZVI/ESBC composite                          | Material: 1 g L <sup>-1</sup> , TC: 50-400 mg L <sup>-1</sup> , pH: 6, 25°C   | 304.62                      | This work                |

Table S3 The major reductive degradation products of TC by P-nZVI/ESBC composite.

| Compound  | m/z   | Molecular weight | Formula                                          | Molecular structure                                                                  |
|-----------|-------|------------------|--------------------------------------------------|--------------------------------------------------------------------------------------|
| TC        | 444.9 | 444.4            | C <sub>22</sub> H <sub>24</sub> N <sub>2</sub> O | 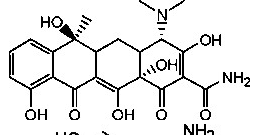  |
| product A | 387.1 | 389.5            | C <sub>20</sub> H <sub>23</sub> NO <sub>7</sub>  |   |
| product B | 329.5 | 330.5            | C <sub>20</sub> H <sub>26</sub> O <sub>4</sub>   |   |
| product C | 270.9 | 270.3            | C <sub>19</sub> H <sub>26</sub> O                |  |

During the reaction, three major degradation products with m/z of 270.9, 329.5 and 387.1 in the filtrate were observed, as shown in Table S1 (Supplementary Information). Previous studies <sup>6, 7</sup> indicated that C-N bonds on TC were prone to be broken due to the lower bond energy. The product A (m/z 387.1) was generated from TC decomposition through the loss of dimethylamino group at C4, an amino group, and a hydroxyl group at C3. Product B (m/z 329.5) was derived from product A (m/z 387.1) degradation via removing an amino group at C4 and three hydroxyl groups at C6, C12, and C12a, meanwhile the carbonyl groups at C1 and C11 were hydrogenated to form hydroxyl groups. Product B (m/z 329.5) further lost two hydroxyl groups and a formyl group to yield product C (m/z 270.9).

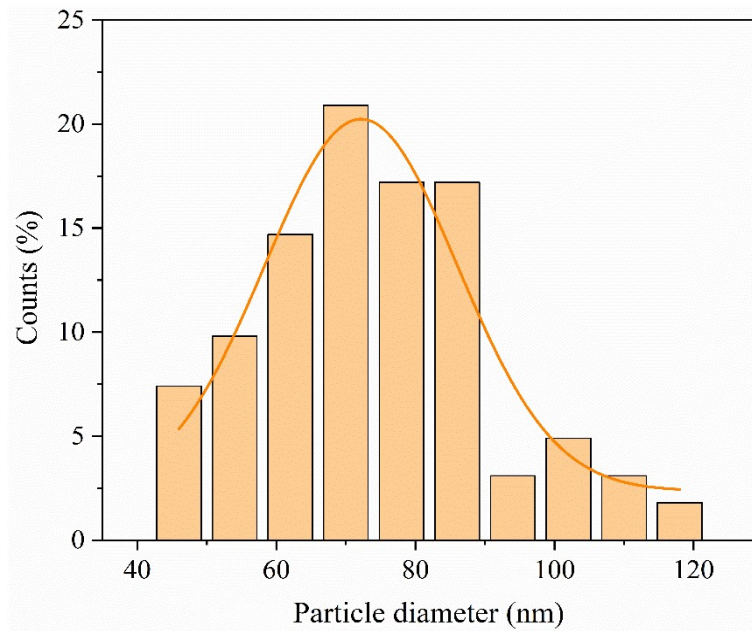

Fig. S1. The size distribution of nZVI obtained by Nano Measurer software statistics.

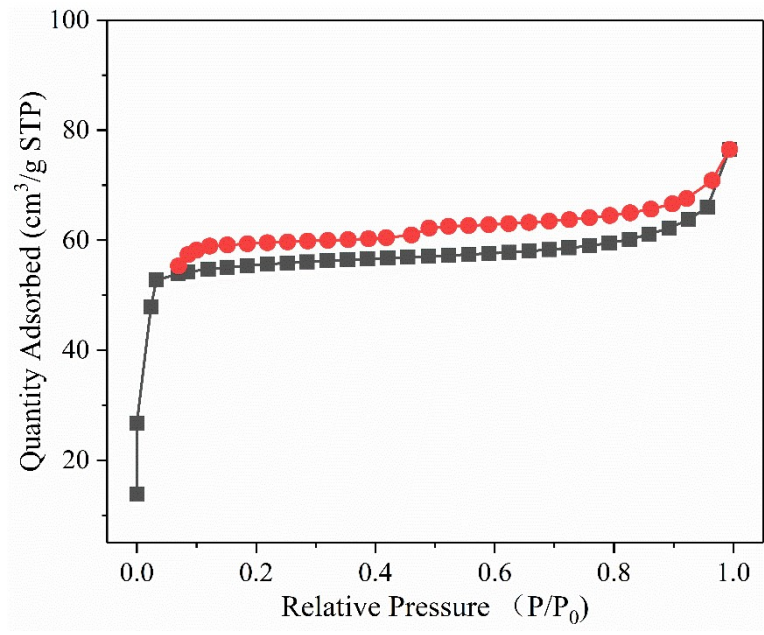

Fig. S2. Nitrogen adsorption–desorption isotherms of P-nZVI/ESBC composite.



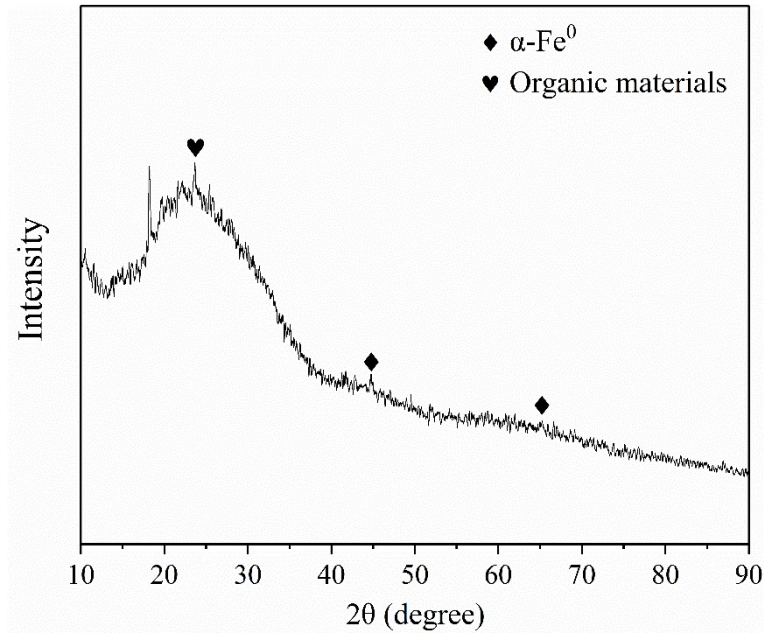

Fig. S3. XRD pattern of P-nZVI.

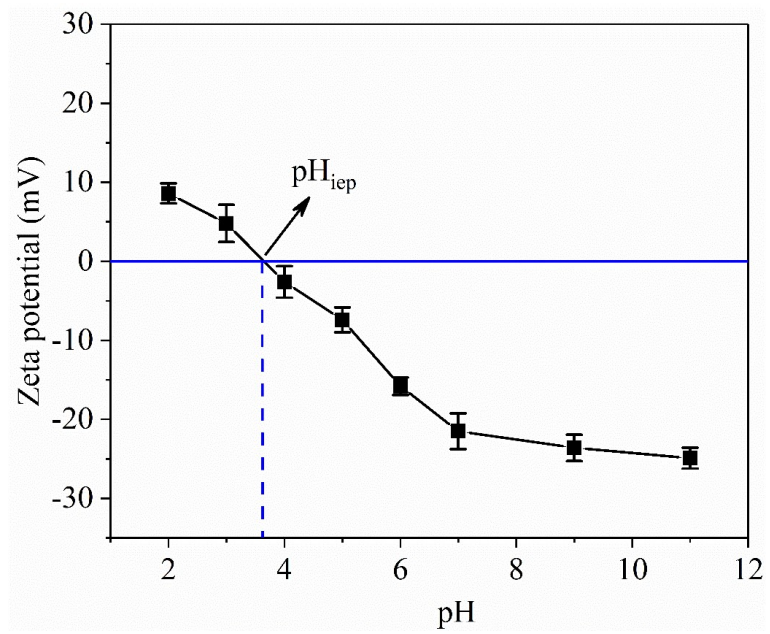

Fig. S4. The zeta potential of P-nZVI/ESBC composite at different solution pH.

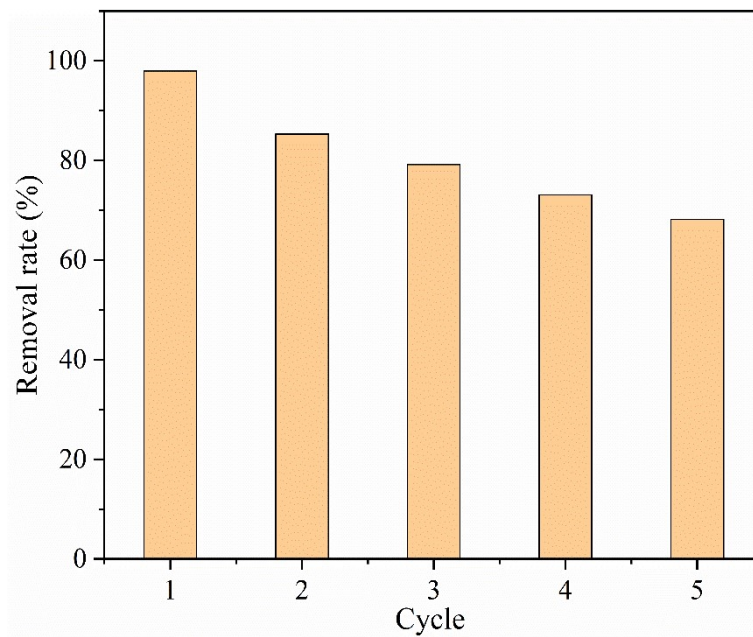

Fig. S5. Reusability test of P-nZVI/ESBC composite.

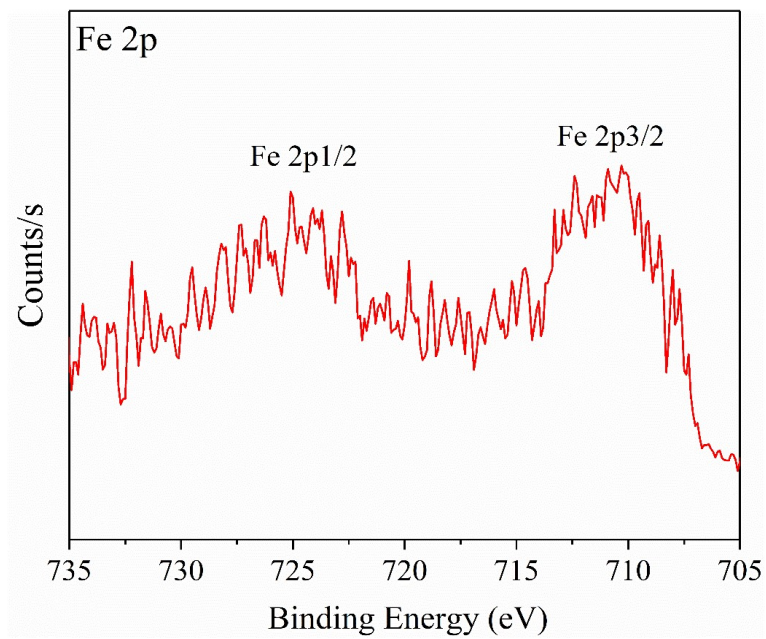

Fig. S6. The high-resolution Fe 2p spectrum of P-nZVI/ESBC composite after reaction with TC.

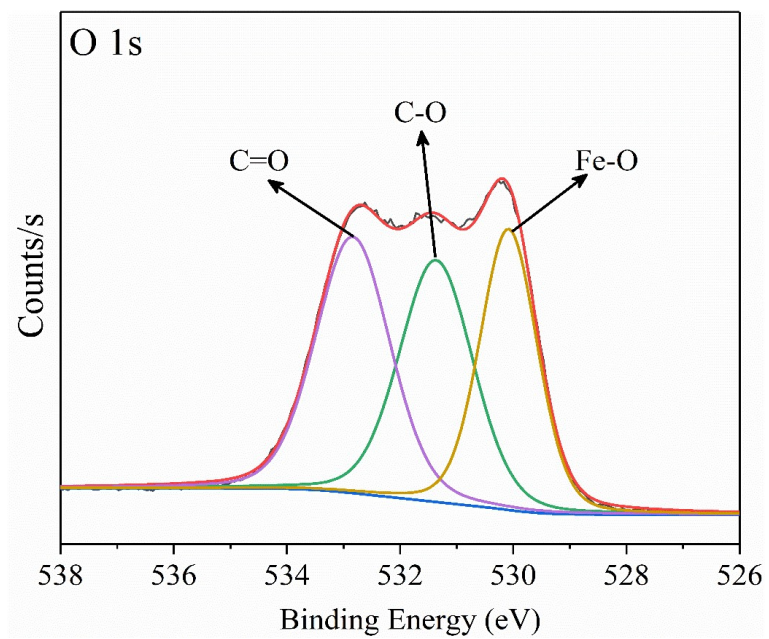

Fig. S7. The high-resolution O 1s spectrum of P-nZVI/ESBC composite after reaction with TC.

## References

1. U. A. Guler, *J. Environ. Eng. . Landsc.*, 2017, **25**, 223-233.
2. J. Shi, X. Yang, C. Zhang, X. Feng, X. Kong, X. Wang and S. Wang, *Env. Pollut. Bioavail.*, 2021, **33**, 247-254.
3. L. Peng, Y. Ren, J. Gu, P. Qin, Q. Zeng, J. Shao, M. Lei and L. Chai, *Environ. Sci. Pollut. R.*, 2014, **21**, 7631-7640.
4. X. Wang, A. Wang, J. Ma and M. Fu, *Chemosphere*, 2017, **166**, 80-88.
5. X. Fan, Z. Qian, J. Liu, N. Geng, J. Hou and D. Li, *Water Sci. Technol.*, 2021, **83**, 739-750.
6. H. Chen, H. Luo, Y. Lan, T. Dong, B. Hu and Y. Wang, *J. Hazard. Mater.*, 2011, **192**, 44-53.
7. H. Dong, Z. Jiang, C. Zhang, J. Deng, K. Hou, Y. Cheng, L. Zhang and G. Zeng, *J. Colloid Interface Sci.*, 2018, **513**, 117-125.
